# Supplementary material for: Detection of Tropical Fungi in Formalin-Fixed, Paraffin-Embedded Tissue: Still an Indication for Microscopy in Times of Sequence-Based Diagnosis?
Source: PubMed Central journal article supplement (PMC4417575; doi:10.1155/2015/938721), 2015-04-19
Supplement: 938721.f1.pdf [file 938721.f1.pdf]

Supplementary Material 1: Applied PCR protocols adapted to the PCR cyclers used. N.a. = not applicable.

|                    | Pan-fungal<br>PCR 1                                                            | Pan-fungal<br>PCR 2                                                                                 | Pan-fungal<br>PCR 3                                                            | Pan-fungal<br>PCR 4                                                                | Pan-fungal<br>PCR 5                                                               | Inhibition<br>control PCR                                                   | Sample quality<br>assessment<br>PCR                   |
|--------------------|--------------------------------------------------------------------------------|-----------------------------------------------------------------------------------------------------|--------------------------------------------------------------------------------|------------------------------------------------------------------------------------|-----------------------------------------------------------------------------------|-----------------------------------------------------------------------------|-------------------------------------------------------|
| PCR cycler         | LightCycler 2.0,<br>Roche, Basel,<br>Switzerland                               | Corbett<br>RotorGene<br>6000, Qiagen,<br>Hilden,<br>Germany                                         | Corbett<br>RotorGene<br>6000, Qiagen                                           | TProfessional<br>Basis,<br>BioMetra, An<br>Analytik Jena<br>Company                | TProfessional<br>Basis, BioMetra                                                  | Corbett<br>RotorGene<br>6000, Qiagen                                        | Corbett<br>RotorGene<br>6000, Qiagen                  |
| Target             | Variable 18S<br>rRNA gene<br>region (usually<br>482–503 base<br>pair fragment) | Variable ITS-2<br>region of the<br>fungal rRNA<br>operon (usually<br>200–360 base<br>pair fragment) | Variable 28S<br>rRNA gene<br>region (usually<br>330–350 base<br>pair fragment) | Variable ITS-2<br>rRNA gene<br>region, (usually<br>254 ± 43 base<br>pair fragment) | Variable ITS-1<br>rRNA gene<br>region (usually<br>295 ± 70 base<br>pair fragment) | Phocid<br>herpesvirus 1<br>(PhHV-1) 1 gB<br>gene (89 base<br>pair fragment) | Human 18S<br>rRNA gene<br>(155 base pair<br>fragment) |
| PCR type           | LightCycler<br>real-time                                                       | EvaGreen real-<br>time                                                                              | EvaGreen real-<br>time                                                         | Traditional PCR                                                                    | Traditional PCR                                                                   | TaqMan real-<br>time                                                        | TaqMan real-<br>time                                  |
| Primers and probes |                                                                                |                                                                                                     |                                                                                |                                                                                    |                                                                                   |                                                                             |                                                       |
| Forward primer     | RTP_1: 5'-ATT-<br>GGA-GGG-<br>CAA-GTC-<br>TGG-TG-3'                            | 5.8S: 5'-GTG-<br>AAT-CAT-CGA-<br>RTC-TTT-GAA-<br>C-3'                                               | 28S-10: 5'-<br>GAC-ATG-<br>GGT-TAG-<br>TCG-ATC-CTA-<br>3'                      | ITS-3: 5'-GCA-<br>TCG-ATG-<br>AAG-AAC-<br>GCA-GC-3'                                | ITS-1: 5'-TCC-<br>GTA-GGT-<br>GAA-CCT-<br>GCG-G-3'                                | PhHV-267s 5'-<br>GGG-CGA-<br>ATC-ACA-GAT-<br>TGA-ATC-3'                     | 18S-f 5'-CTC-<br>TTA-GCT-<br>GAG-TGT-<br>CCC-GC-3'    |

|                |                                                                                                                                            |                                                         |                                                               |                                                     |                                                     |                                                                                     |                                                                             |
|----------------|--------------------------------------------------------------------------------------------------------------------------------------------|---------------------------------------------------------|---------------------------------------------------------------|-----------------------------------------------------|-----------------------------------------------------|-------------------------------------------------------------------------------------|-----------------------------------------------------------------------------|
| Reverse primer | RTP_2: 5'-<br>CCG-ATC-<br>CCT-AGT-<br>CGG-CAT-AG-<br>3'                                                                                    | 28S1-rev: 5'-<br>TAT-GCT-TAA-<br>GTT-CAG-<br>CGG-GTA-3' | 28S-12-rev: 5'-<br>CCT-TAT-CTA-<br>CAT-TRT-TCT-<br>ATC-AAC-3' | ITS-4: 5'-TCC-<br>TCC-GCT-<br>TAT-TGA-<br>TAT-GC-3' | ITS-2: 5'-GCT-<br>GCG-TTC-TTC-<br>ATC-GAT-GC-<br>3' | PhHV-337as 5'-<br>GCG-GTT-<br>CCA-AAC-<br>GTA-CCA-A-3'                              | 18S-r 5'-CTT-<br>AAT-CAT-<br>GGC-CTC-<br>AGT-TCC-GA-<br>3'                  |
| Probe(s)       | RTP_p1: 5'-<br>3FL-TTC-AAC-<br>TAC-gAg-CTT-<br>TTT-AAC-Tg-3';<br>RTP_p2: 5'-LC-<br>Red640-AAC-<br>AAC-TTT-AAT-<br>ATA-CgC-TAT-<br>Tgg A-3' | n.a.                                                    | n.a.                                                          | n.a.                                                | n.a.                                                | PhHV-305tq 5'-<br>Cy55-TTT-TTA-<br>TGT-GTC-<br>CGC-CAC-<br>CAT-CTG-GAT-<br>C-BBQ-3' | 18S-p 5'-FAM-<br>CCG-AGC-<br>CGC-CTG-<br>GAT-ACC-<br>GCA-GCT-A-<br>TAMRA-3' |

---

Adapted reaction chemistry

---

|                           |                                                                                                           |                                                                                |                                                                |                                      |                                      |                                      |                                      |
|---------------------------|-----------------------------------------------------------------------------------------------------------|--------------------------------------------------------------------------------|----------------------------------------------------------------|--------------------------------------|--------------------------------------|--------------------------------------|--------------------------------------|
| Mastermix                 | Taq DNA<br>polymerase in<br>10x PCR buffer<br>(P1806 Sigma),<br>(Sigma-Aldrich,<br>St. Louis, MO,<br>USA) | HotStarTaq<br>master-mix<br>(Qiagen),<br>EvaGreen<br>(Biotium,<br>Hayward, CA) | HotStarTaq<br>master-mix<br>(Qiagen),<br>EvaGreen<br>(Biotium) | HotStarTaq<br>master-mix<br>(Qiagen) | HotStarTaq<br>master-mix<br>(Qiagen) | HotStarTaq<br>master-mix<br>(Qiagen) | HotStarTaq<br>master-mix<br>(Qiagen) |
| MgCl <sub>2</sub> (total) | 3.0 mmol/l                                                                                                | 3.0 mmol/l                                                                     | 3.0 mmol/l                                                     | 2.5 mmol/l                           | 2.5 mmol/l                           | 5.0 mmol/l                           | 6.0 mmol/l                           |

|                              |                |               |               |              |              |              |              |
|------------------------------|----------------|---------------|---------------|--------------|--------------|--------------|--------------|
| Forward primer concentration | 0.4 pmol/μl    | 0.6 pmol/μl   | 0.8 pmol/μl   | 0.2 pmol/μl  | 0.5 pmol/μl  | 4.0 pmol/μl  | 16 pmol/μl   |
| Reverse primer concentration | 0.4 pmol/μl    | 0.6 pmol/μl   | 0.8 pmol/μl   | 0.2 pmol/μl  | 0.5 pmol/μl  | 4.0 pmol/μl  | 16 pmol/μl   |
| Probe(s) Concentration       | 0.5 pmol/μl    | n.a.          | n.a.          | n.a.         | n.a.         | 5.0 pmol/μl  | 4.5 pmol/μl  |
| <hr/>                        |                |               |               |              |              |              |              |
| PCR protocol                 |                |               |               |              |              |              |              |
| Initial denaturation         | 95°C, 10 min   | 95°C, 10 min  | 95°C, 10 min  | 94°C, 10 min | 94°C, 10 min | 95°C, 15 min | 95°C, 10 min |
| Cycles                       | n=45           | n=45          | n=45          | n=40         | n=30         | n=40         | n=40         |
| Denaturation                 | 95°C, 15 s     | 95°C, 10 min  | 95°C, 10 min  | 94°C, 1 min  | 94°C, 30 s   | 95°C, 15     | 95°C, 15 s   |
| Annealing                    | 55°C, 10 s     | 55°C, 30 s    | 55°C, 30 s    | 51°C, 1 min  | 58°C, 30 s   | 60°C, 30 s   | 65°C, 65 s   |
| Extension                    | 72°C, 25 s     | 72°C, 40 s    | 72°C, 40 s    | 72°C, 1 min  | 72°C, 30 s   | 72°C, 30 s   | 65°C, 65 s   |
| Final extension              | -              | -             | -             | 72°C, 10 min | 72°C, 30 s   | -            | -            |
| <hr/>                        |                |               |               |              |              |              |              |
| Melting protocol             |                |               |               |              |              |              |              |
| Denaturation                 | 95°C, 20 s     | 95°C, 2 min   | 95°C, 2 min   | n.a.         | n.a.         | n.a.         | n.a.         |
| Annealing                    | 45°C, 20 s     | 68°C, 30 s    | 68°C, 30 s    | n.a.         | n.a.         | n.a.         | n.a.         |
| Melting                      | 95°C, 0.2 °C/s | 99°C, 0.2 C/s | 99°C, 0.2 C/s | n.a.         | n.a.         | n.a.         | n.a.         |
| Cooling                      | 40°C, 20 s     | 40°C, 20 s    | 40°C, 20 s    | n.a.         | n.a.         | n.a.         | n.a.         |

Supplementary Material 2: Results of pan-fungal PCR 1 (best matches). Ct = cycle threshold.

| Sample I.D. | Histological diagnosis           | Ct-value | Peak in the melting curve analysis | Readable sequence fragment length (base pairs) | Coverage | Identity | Sequence results (NCBI BLAST, organism: fungi)                                                                                |
|-------------|----------------------------------|----------|------------------------------------|------------------------------------------------|----------|----------|-------------------------------------------------------------------------------------------------------------------------------|
| Case 1      | Chromoblastomycosis              | –        | 74°C                               | 503                                            | 100%     | 97%      | Multiple species, no discrimination possible                                                                                  |
| Case 2      | Mucormycosis                     | –        | 74°C                               | 59                                             | 81%      | 96%      | <i>Aspergillus</i> spp./ <i>Penicillium</i> spp.                                                                              |
| Case 3      | Histoplasmosis                   | –        | 74°C                               | 259                                            | 100%     | 97%      | <i>Cryptococcus carnescens</i> / <i>Cryptococcus psychrotolerans</i> / <i>Cryptococcus peneaus</i> / <i>Taphrina maculans</i> |
| Case 4      | Mucormycosis                     | –        | 86°C                               | 23                                             | 100%     | 100%     | <i>Delitschia didyma</i>                                                                                                      |
| Case 5      | Histoplasmosis or cryptococcosis | –        | 74°C                               | 60                                             | 36%      | 100%     | <i>Lactarius indigo</i> / <i>Candida piceae</i> / <i>Glomus</i> spp.                                                          |
| Case 6      | Chromoblastomycosis              | –        | 74°C                               | 170                                            | 92%      | 94%      | <i>Xylomyces</i> spp./ <i>Speiropsis</i> spp./ <i>Jahnula</i> spp./ <i>Brachiosphaera</i>                                     |

|         |                            |    |      |     |      |      |                                                                                                     |
|---------|----------------------------|----|------|-----|------|------|-----------------------------------------------------------------------------------------------------|
|         |                            |    |      | 42  | 50%  | 100% | spp./ <i>Megalohypha</i> spp.<br><i>Lactarius indigo</i> <i>Candida piceae</i> / <i>Glomus</i> spp. |
| Case 7  | Rhinosporidiosis           | –  | 73°C | –   | –    | –    | Non-interpretable, poor/overlapping sequences                                                       |
| Case 8  | Mycetoma/madur<br>omycosis | –  | 74°C | 56  | 37%  | 100% | <i>Lactarius indigo</i> / <i>Candida piceae</i> / <i>Glomus</i> spp.                                |
| Case 9  | Rhinosporidiosis           | –  | 74°C | 237 | 100% | 97%  | Multiple species, no discrimination possible                                                        |
| Case 10 | Mycetoma/madur<br>omycosis | 38 | 74°C | 521 | 98%  | 98%  | Multiple fungal species including <i>Penicillium</i> spp./ <i>Aspergillus</i> spp.                  |
| Case 11 | Histoplasmosis             | –  | 74°C | –   | –    | –    | Non-interpretable, poor/overlapping sequences                                                       |
| Case 12 | Histoplasmosis             | 33 | 74°C | 463 | 100% | 100% | <i>Candida parapsilosis</i>                                                                         |
| Case 13 | Chromoblastomy<br>cosis    | –  | 74°C | 527 | 100% | 99%  | Multiple fungal species including <i>Penicillium</i> spp./ <i>Aspergillus</i> spp.                  |
| Case 14 | Histoplasmosis             | –  | 74°C | 269 | 71%  | 92%  | <i>Ajellomyces capsulatus</i> / <i>Histoplasma capsulatum</i>                                       |
| Case 15 | Coccidioidomyco<br>sis     | –  | 74°C | 298 | 100% | 91%  | Multiple species, no discrimination possible                                                        |

|           |                        |   |      |    |      |      |                                                                              |
|-----------|------------------------|---|------|----|------|------|------------------------------------------------------------------------------|
| Case 16   | Coccidioidomycosis     | – | 75°C | 39 | 50%  | 100% | <i>Delitschia didyma</i>                                                     |
| Case 17   | Mycetoma/maduromycosis | – | 80°C | 46 | 50%  | 100% | <i>Delitschia didyma</i>                                                     |
| Control 1 | Negative control       | – | 74°C | 20 | 100% | 100% | <i>Funneliformis</i> spp./ <i>Glomus</i> spp./ <i>Candida salmanticensis</i> |
| Control 2 | Negative control       | – | 74°C | –  | –    | –    | Non-interpretable, poor/overlapping sequences                                |
| Control 3 | Negative control       | – | 74°C | –  | –    | –    | Non-interpretable, poor/overlapping sequences                                |

---

Supplementary Material 3: Results of pan-fungal PCR 2 (best matches). Ct = cycle threshold.

| Sample I.D. | Histological diagnosis           | Ct-value | Peak in the melting curve analysis | Readable sequence fragment length (base pairs) | Coverage     | Identity    | Sequence results (NCBI BLAST, organism: fungi)                            |
|-------------|----------------------------------|----------|------------------------------------|------------------------------------------------|--------------|-------------|---------------------------------------------------------------------------|
| Case 1      | Chromoblastomycosis              | 26       | 87°C                               | –                                              | –            | –           | Non-interpretable, poor/overlapping sequences                             |
| Case 2      | Mucormycosis                     | 25       | 87°C                               | 130<br>114                                     | 99%<br>100%  | 98%<br>100% | <i>Candida parapsilosis</i><br><i>Candida parapsilosis</i>                |
| Case 3      | Histoplasmosis                   | 31       | 89°C                               | –                                              | –            | –           | Non-interpretable, poor/overlapping sequences                             |
| Case 4      | Mucormycosis                     | 32       | Multiple                           | 68<br>66                                       | 100%<br>100% | 97%<br>98%  | Various <i>Candida</i> spp./ <i>Yarrowia</i> spp.<br><i>Candida galli</i> |
| Case 5      | Histoplasmosis or cryptococcosis | 29       | 89°C                               | –                                              | –            | –           | Non-interpretable, poor/overlapping sequences                             |
| Case 6      | Chromoblastomycosis              | 43       | Multiple                           | –                                              | –            | –           | Non-interpretable, poor/overlapping sequences                             |
| Case 7      | Rhinosporidiosis                 | 30       | 77°C                               | –                                              | –            | –           | Non-interpretable, poor/overlapping sequences                             |
| Case 8      | Mycetoma/Madur                   | –        | –                                  | –                                              | –            | –           | –                                                                         |

|           |                            |    |      |     |      |      |                                                  |
|-----------|----------------------------|----|------|-----|------|------|--------------------------------------------------|
|           | omycosis                   |    |      |     |      |      |                                                  |
| Case 9    | Rhinosporidiosis           | 25 | 87°C | –   | –    | –    | Non-interpretable,<br>poor/overlapping sequences |
| Case 10   | Mycetoma/madur<br>omycosis | 25 | 87°C | –   | –    | –    | Non-interpretable,<br>poor/overlapping sequences |
| Case 11   | Histoplasmosis             | 32 | 86°C | 141 | 99%  | 100% | <i>Candida parapsilosis</i>                      |
|           |                            |    |      | 130 | 99%  | 98%  | <i>Candida parapsilosis</i>                      |
| Case 12   | Histoplasmosis             | 17 | 87°C | 231 | 99%  | 100% | <i>Candida parapsilosis</i>                      |
| Case 13   | Chromoblastomy<br>cosis    | 23 | 87°C | 238 | 65%  | 100% | <i>Candida parapsilosis</i>                      |
|           |                            |    |      | 161 | 54%  | 97%  | Various <i>Candida</i> spp.                      |
| Case 14   | Histoplasmosis             | –  | 86°C | –   | –    | –    | Non-interpretable,<br>poor/overlapping sequences |
| Case 15   | Coccidioidomyco<br>sis     | 27 | 86°C | 240 | 100% | 99%  | <i>Candida parapsilosis</i>                      |
| Case 16   | Coccidioidomyco<br>sis     | 29 | 86°C | 113 | 100% | 99%  | <i>Candida parapsilosis</i>                      |
| Case 17   | Mycetoma/madur<br>omycosis | 30 | 87°C | –   | –    | –    | Non-interpretable,<br>poor/overlapping sequences |
| Control 1 | Negative control           | –  | 89°C | –   | –    | –    | Non-interpretable,<br>poor/overlapping sequences |
| Control 2 | Negative control           | –  | 89°C | –   | –    | –    | Non-interpretable,<br>poor/overlapping sequences |
| Control 3 | Negative control           | –  | 88°C | –   | –    | –    | Non-interpretable,                               |

---



poor/overlapping sequences

---

Supplementary Material 4: Results of pan-fungal PCR 3 (best matches). Ct = cycle threshold.

| Sample I.D. | Histological diagnosis           | Ct-value | Peak in the melting curve analysis | Readable sequence fragment length (base pairs) | Coverage | Identity | Sequence results (NCBI BLAST, organism: fungi)   |
|-------------|----------------------------------|----------|------------------------------------|------------------------------------------------|----------|----------|--------------------------------------------------|
| Case 1      | Chromoblastomycosis              | 33       | Multiple                           | 137                                            | 100%     | 96%      | <i>Umbilicaria torrefacta/Placynthium nigrum</i> |
| Case 2      | Mucormycosis                     | 32       | 88°C                               | –                                              | –        | –        | Non-interpretable, poor/overlapping sequences    |
| Case 3      | Histoplasmosis                   | 40       | 91°C                               | 139                                            | 100%     | 99%      | Various <i>Umbilicaria</i> spp.                  |
| Case 4      | Mucormycosis                     | –        | –                                  | –                                              | –        | –        | –                                                |
| Case 5      | Histoplasmosis or cryptococcosis | 39       | Multiple                           | 151                                            | 100%     | 99%      | Various <i>Umbilicaria</i> spp.                  |
| Case 6      | Chromoblastomycosis              | –        | –                                  | –                                              | –        | –        | –                                                |
| Case 7      | Rhinosporidiosis                 | 43       | Multiple                           | –                                              | –        | –        | Non-interpretable, poor/overlapping sequences    |
| Case 8      | Mycetoma/maduroomycosis          | –        | –                                  | –                                              | –        | –        | –                                                |
| Case 9      | Rhinosporidiosis                 | 33       | 91°C                               | 273                                            | 71%      | 96%      | Various <i>Umbilicaria</i> spp.                  |

|           |                            |    |          |     |      |      |                                                                                                                  |
|-----------|----------------------------|----|----------|-----|------|------|------------------------------------------------------------------------------------------------------------------|
| Case 10   | Mycetoma/madur<br>omycosis | 30 | 91°C     | –   | –    | –    | Non-interpretable,<br>poor/overlapping sequences                                                                 |
| Case 11   | Histoplasmosis             | –  | –        | –   | –    | –    | Non-interpretable,<br>poor/overlapping sequences                                                                 |
| Case 12   | Histoplasmosis             | 26 | 88°C     | 370 | 99%  | 100% | <i>Candida parapsilosis</i>                                                                                      |
| Case 13   | Chromoblastomy<br>cosis    | 31 | 91°C     | 147 | 100% | 98%  | <i>Penicillium</i> spp.                                                                                          |
| Case 14   | Histoplasmosis             | –  | 85°C     | 357 | 100% | 98%  | <i>Paecilomyces variotii</i>                                                                                     |
| Case 15   | Coccidioidomyco<br>sis     | 37 | 88°C     | –   | –    | –    | Non-interpretable,<br>poor/overlapping sequences                                                                 |
| Case 16   | Coccidioidomyco<br>sis     | 41 | 91°C     | –   | –    | –    | Non-interpretable,<br>poor/overlapping sequences                                                                 |
| Case 17   | Mycetoma/madur<br>omycosis | 44 | Multiple | 374 | 99%  | 98%  | <i>Myceliophthora<br/>thermophila/Thielavia<br/>terrestris/Neurospora crassa</i>                                 |
| Control 1 | Negative control           | –  | –        | 123 | 100% | 96%  | Various <i>Umbilicaria</i> spp.                                                                                  |
| Control 2 | Negative control           | –  | –        | 123 | 100% | 98%  | Various <i>Umbilicaria</i> spp.                                                                                  |
| Control 3 | Negative control           | –  | –        | 120 | 100% | 98%  | <i>Umbilicaria</i> spp./ <i>Lasallia</i><br>spp./ <i>Boreoplaca<br/>ultrafrigida/Rhizoplaca<br/>huashanensis</i> |

---

Supplementary Material 5: Results of pan-fungal PCR 4 (best matches). Ct = cycle threshold.

| Sample I.D. | Histological diagnosis           | PCR positive (visible bands in electrophoresis) | Readable sequence fragment length (base pairs) | Coverage | Identity | Sequence results (NCBI BLAST, organism: fungi)                             |
|-------------|----------------------------------|-------------------------------------------------|------------------------------------------------|----------|----------|----------------------------------------------------------------------------|
| Case 1      | Chromoblastomycosis              | Positive                                        | –                                              | –        | –        | Non-interpretable, poor/overlapping sequences                              |
| Case 2      | Mucormycosis                     | Positive                                        | –                                              | –        | –        | Non-interpretable, poor/overlapping sequences                              |
| Case 3      | Histoplasmosis                   | Positive                                        | 502                                            | 65%      | 97%      | various <i>Penicillium</i> spp.                                            |
| Case 4      | Mucormycosis                     | Positive                                        | 439                                            | 76%      | 99%      | multiple species, no discrimination possible                               |
| Case 5      | Histoplasmosis or Cryptococcosis | Positive                                        | 403<br>16                                      | 28%<br>– | 99%<br>– | <i>Neofusicoccum</i> spp.<br>Non-interpretable, poor/overlapping sequences |
| Case 6      | Chromoblastomycosis              | Positive                                        | –                                              | –        | –        | Non-interpretable, poor/overlapping sequences                              |
| Case 7      | Rhinosporidiosis                 | Positive                                        | 45                                             | 93%      | 100%     | <i>Candida</i> spp./ <i>Malassezia</i> spp./ <i>Starmerella</i> spp.       |
| Case 8      | Mycetoma/maduromycosis           | Positive                                        | –                                              | –        | –        | Non-interpretable, poor/overlapping sequences                              |
| Case 9      | Rhinosporidiosis                 | Positive                                        | 205                                            | 83%      | 85%      | <i>Rhizoctonia solani</i>                                                  |

|           |                            |          |     |      |      |                                                                         |
|-----------|----------------------------|----------|-----|------|------|-------------------------------------------------------------------------|
| Case 10   | Mycetoma/madur<br>omycosis | Positive | 241 | 100% | 99%  | various <i>Penicillium</i> spp.                                         |
|           |                            |          | 146 | 83%  | 95%  | <i>Talaromyces flavus</i>                                               |
| Case 11   | Histoplasmosis             | Positive | 305 | 100% | 97%  | <i>Trametes</i> spp./ <i>Tricholoma</i><br>spp./ <i>Phellinus</i> spp.  |
|           |                            |          | 142 | 100% | 99%  | <i>Trametes</i> spp.                                                    |
| Case 12   | Histoplasmosis             | Positive | 493 | 68%  | 100% | <i>Candida parapsilosis</i>                                             |
| Case 13   | Chromoblastomy<br>cosis    | Positive | 72  | 100% | 97%  | <i>Aspergillus</i> spp.                                                 |
|           |                            |          | 20  | 100% | 100% | <i>Ajellomyces capsulatus</i> / <i>Histoplasma</i><br><i>capsulatum</i> |
| Case 14   | Histoplasmosis             | Positive | 286 | 100% | 100% | <i>Ajellomyces capsulatus</i> / <i>Histoplasma</i><br><i>capsulatum</i> |
| Case 15   | Coccidioidomyco<br>sis     | Positive | 103 | 100% | 98%  | <i>Candida parapsilosis</i>                                             |
| Case 16   | Coccidioidomyco<br>sis     | Positive | –   | –    | –    | Non-interpretable, poor/overlapping<br>sequences                        |
| Case 17   | Mycetoma/madur<br>omycosis | Positive | 444 | 82%  | 100% | <i>Madurella mycetomatis</i>                                            |
| Control 1 | Negative control           | Positive | 401 | 79%  | 94%  | <i>Davidiella tassiani</i>                                              |
| Control 2 | Negative control           | Positive | –   | –    | –    | Non-interpretable, poor/overlapping<br>sequences                        |
| Control 3 | Negative control           | Positive | –   | –    | –    | Non-interpretable, poor/overlapping<br>sequences                        |

---

Supplementary Material 6: Results of pan-fungal PCR 5 (best matches). Ct = cycle threshold.

| Sample I.D. | Histological diagnosis           | PCR positive (visible bands in electrophoresis) | Readable sequence fragment length (base pairs) | Coverage | Identity | Sequence results (NCBI BLAST, organism: fungi) |
|-------------|----------------------------------|-------------------------------------------------|------------------------------------------------|----------|----------|------------------------------------------------|
| Case 1      | Chromoblastomycosis              | Positive                                        | –                                              | –        | –        | Non-interpretable, poor/overlapping sequences  |
| Case 2      | Mucormycosis                     | Positive                                        | 66                                             | 100%     | 100%     | <i>Candida parapsilosis</i>                    |
| Case 3      | Histoplasmosis                   | –                                               | –                                              | –        | –        | –                                              |
| Case 4      | Mucormycosis                     | –                                               | –                                              | –        | –        | –                                              |
| Case 5      | Histoplasmosis or Cryptococcosis | Positive                                        | –                                              | –        | –        | Non-interpretable, poor/overlapping sequences  |
| Case 6      | Chromoblastomycosis              | –                                               | –                                              | –        | –        | –                                              |
| Case 7      | Rhinosporidiosis                 | –                                               | –                                              | –        | –        | –                                              |
| Case 8      | Mycetoma/Maduromyces             | –                                               | –                                              | –        | –        | –                                              |
| Case 9      | Rhinosporidiosis                 | Positive                                        | –                                              | –        | –        | Non-interpretable, poor/overlapping sequences  |
| Case 10     | Mycetoma/maduromyces             | Positive                                        | –                                              | –        | –        | Non-interpretable, poor/overlapping sequences  |
| Case 11     | Histoplasmosis                   | –                                               | –                                              | –        | –        | –                                              |

|           |                        |          |     |      |      |                                                                     |
|-----------|------------------------|----------|-----|------|------|---------------------------------------------------------------------|
| Case 12   | Histoplasmosis         | Positive | 452 | 98%  | 100% | <i>Candida parapsilosis/Tremellales spp./Saccharomycetales spp.</i> |
| Case 13   | Chromoblastomycosis    | Positive | 128 | 81%  | 100% | <i>Candida parapsilosis</i>                                         |
| Case 14   | Histoplasmosis         | –        | –   | –    | –    | –                                                                   |
| Case 15   | Coccidioidomycosis     | Positive | 227 | 100% | 100% | <i>Candida parapsilosis</i>                                         |
| Case 16   | Coccidioidomycosis     | Positive | –   | –    | –    | Non-interpretable, poor/overlapping sequences                       |
| Case 17   | Mycetoma/maduromycosis | Positive | –   | –    | –    | Non-interpretable, poor/overlapping sequences                       |
| Control 1 | Negative control       | –        | –   | –    | –    | –                                                                   |
| Control 2 | Negative control       | –        | –   | –    | –    | –                                                                   |
| Control 3 | Negative control       | –        | –   | –    | –    | –                                                                   |

---
